# Supplementary material
Source: PubMed Central journal article supplement (PMC6060005)
Supplement: NIHMS969171-supplement-Supplemental_Digital_Content.pdf [file NIHMS969171-supplement-Supplemental_Digital_Content.pdf]

**Appendix 1. Defining the study population. OUD, opioid use disorder.**

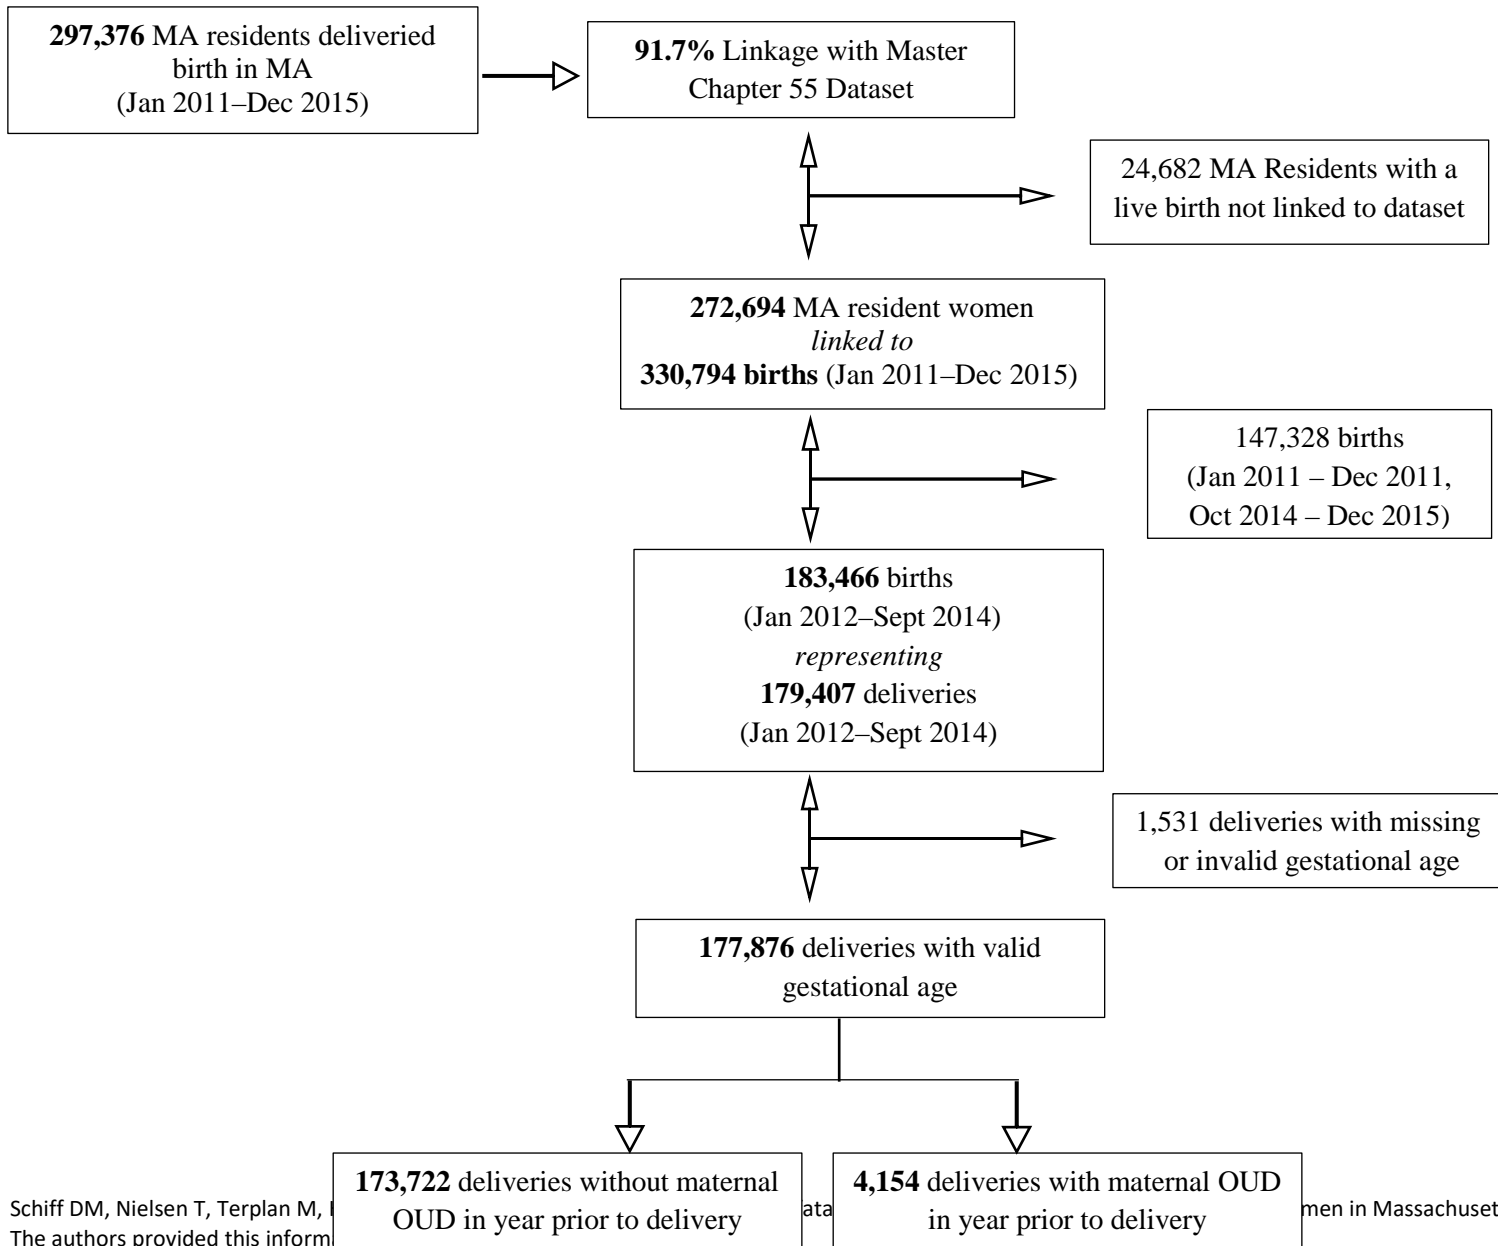

**Appendix 2. ICD-CM Codes Used for Identification**

| Characteristic                                | ICD9-CM                                  | ICD10-CM                                                                                                                                                                                                                                                                                                                      |
|-----------------------------------------------|------------------------------------------|-------------------------------------------------------------------------------------------------------------------------------------------------------------------------------------------------------------------------------------------------------------------------------------------------------------------------------|
| Opioid Use Disorder<br>(abuse and dependence) | 30400-30403, 30470-30473,<br>30550-30553 | F1120, F1121, F1110,<br>F11120-F11122, F11129,<br>F1114, F11150, F11151,<br>F11159, F11181, F11182,<br>F11188, F1119-F11222,<br>F11229, F1123, F1124,<br>F11250, F11251, F11259,<br>F11281, F11282, F11288,<br>F1129, F1190-F11922,<br>F11929, F11913, F11914,<br>F11950, F11951, F11959,<br>F11981, F11982, F11989,<br>F1199 |
| Overdose Encounters                           | 96500-96502, 96509, E8500-<br>E8502      |                                                                                                                                                                                                                                                                                                                               |
| NAS diagnosis                                 | 7795, 76062, 76072                       | P961, P0449                                                                                                                                                                                                                                                                                                                   |

Schiff DM, Nielsen T, Terplan M, Hood M, Bernson D, Diop H, et al. Fatal and nonfatal overdose among pregnant and postpartum women in Massachusetts. *Obstet Gynecol* 2018; 132.

The authors provided this information as a supplement to their article.

©2018 American College of Obstetricians and Gynecologists.

### Appendix 3. Opioid Use Disorder Identification Across Datasets

|                                    | OUD Any time 2011-2015 (n=6,861) |                                 | OUD 1 year before or after delivery (n=5,016) |                                 | OUD 1 year prior to or at delivery (n=4,154) |                                 |
|------------------------------------|----------------------------------|---------------------------------|-----------------------------------------------|---------------------------------|----------------------------------------------|---------------------------------|
|                                    | Identified<br>n (%)              | Uniquely<br>identified<br>n (%) | Identified<br>n (%)                           | Uniquely<br>identified<br>n (%) | Identified<br>n (%)                          | Uniquely<br>identified<br>n (%) |
| APCD – OUD Codes                   | 5,290 (77.1)                     | 623 (9.1)                       | 3,091 (61.6)                                  | 348 (6.9)                       | 1,731 (41.7)                                 | 165 (4.0)                       |
| APCD – Methadone TX                | 1,935 (28.2)                     | 133 (1.9)                       | 1,307 (26.1)                                  | 109 (2.2)                       | 976 (23.5)                                   | 114 (2.7)                       |
| CM – OD Event                      | 466 (6.8)                        | 45 (0.7)                        | 148 (3.0)                                     | 20 (0.4)                        | 64 (1.5)                                     | *                               |
| CM – OUD Codes                     | 2,787 (40.6)                     | 174 (2.5)                       | 2,094 (41.8)                                  | 178 (3.5)                       | 1,772 (42.7)                                 | 204 (4.9)                       |
| BSAS – Opioid Related Enrollment   | 3,484 (50.8)                     | 209 (3.0)                       | 2,070 (41.8)                                  | 174 (3.5)                       | 1,330 (32.0)                                 | 159 (3.8)                       |
| BSAS – Methadone Enrollment        | 1,631 (23.8)                     | 0 (0.0)                         | 951 (19.0)                                    | 0 (0.0)                         | 654 (15.7)                                   | 0 (0.0)                         |
| BSAS – Methadone Service           | 1,807 (26.3)                     | *                               | 1,299 (25.9)                                  | *                               | 1,085 (26.1)                                 | 23 (0.6)                        |
| PDMP – Buprenorphine prescription  | 3,060 (44.6)                     | 185 (2.7)                       | 2,029 (40.5)                                  | 0 (0.0)                         | 1,526 (36.7)                                 | 310 (7.5)                       |
| MATRIS – Opioid Transport          | 529 (7.7)                        | 76 (1.1)                        | 161 (3.2)                                     | 32 (0.6)                        | 41 (1.0)                                     | *                               |
| Death certificate – Overdose death | 65 (1.0)                         | *                               | 13 (0.3)                                      | *                               | N/A                                          | N/A                             |
| Death certificate – History of SA  | 23 (0.3)                         | 0 (0.0)                         | *                                             | 0 (0.0)                         | N/A                                          | N/A                             |
| DOC – Treated in prison†           | 389 (5.7)                        | 62 (0.9)                        | N/A                                           | N/A                             | N/A                                          | N/A                             |
| NAS diagnosis                      | 1,866 (27.2)                     | 328 (4.8)                       | 1,866 (37.2)                                  | 409 (8.2)                       | 1,866 (44.9)                                 | 515 (12.4)                      |

\* Suppressed due to small numbers

† At any time 2011–2015

APCD = All Payer Claims Database; BSAS = Bureau of Substance Addiction Services; CM = Casemix Database; DOC = Department of Corrections; MATRIS = Massachusetts Ambulance Trip Record Information System; OD = overdose; NAS = Neonatal abstinence syndrome; OUD = Opioid use disorder; PDMP = Prescription Data Monitoring Program;

Schiff DM, Nielsen T, Terplan M, Hood M, Bernson D, Diop H, et al. Fatal and nonfatal overdose among pregnant and postpartum women in Massachusetts. *Obstet Gynecol* 2018; 132.

The authors provided this information as a supplement to their article.

©2018 American College of Obstetricians and Gynecologists.

**Appendix 4. Identifying opioid-related overdose events. OUD, opioid use disorder.**

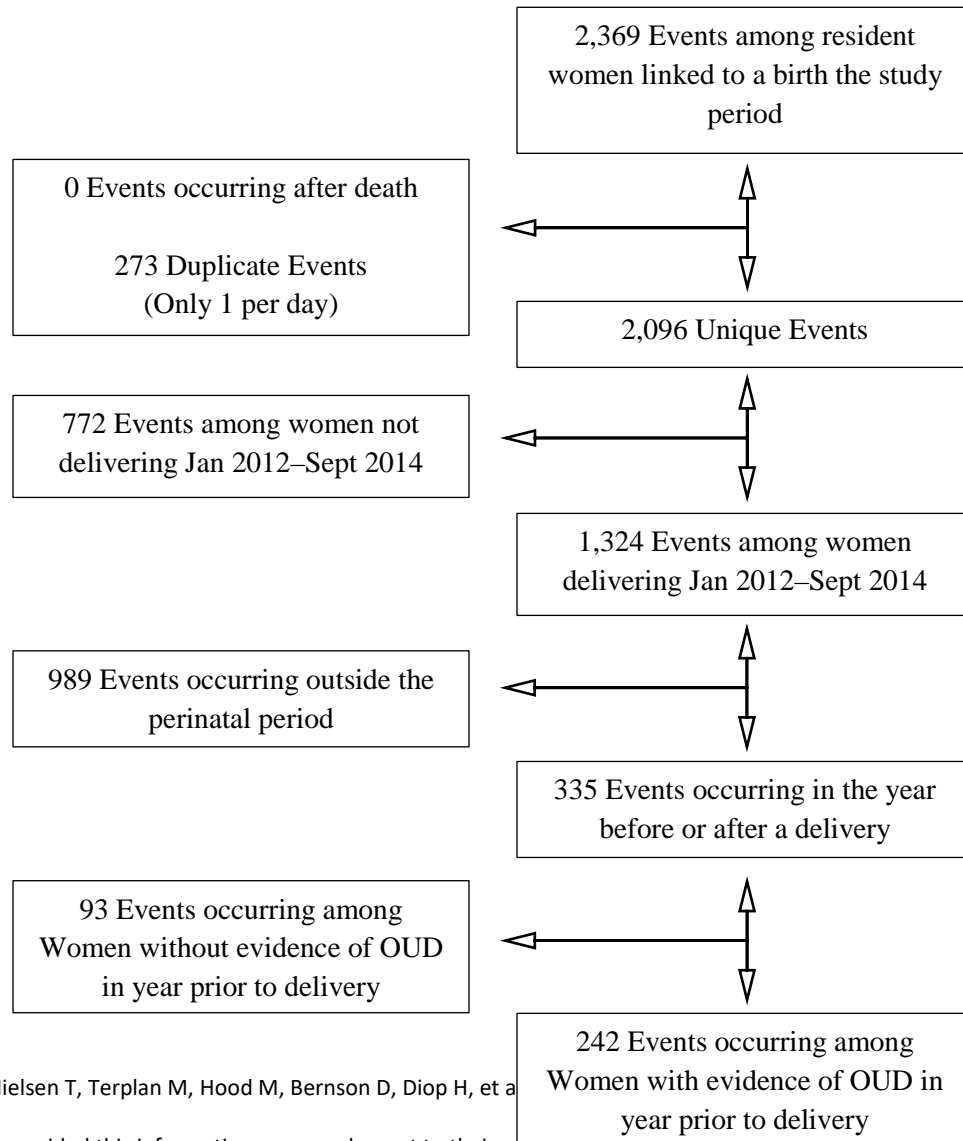

Schiff DM, Nielsen T, Terplan M, Hood M, Bernson D, Diop H, et al. *Obstet Gynecol*. 2018; 131.

The authors provided this information as a supplement to their article.

©2018 American College of Obstetricians and Gynecologists.

and postpartum women in Massachusetts. *Obstet Gynecol*

### Appendix 5. Conversion Table for Mapping Monthly Pharmacotherapy Data to Time Periods of Interest and Estimating the Number of Person-Days in Denominator of Rates

| GA (wks) | 12         | 11 | 10       | 9        | 8        | 7        | 6        | 5        | 4        | 3        | 2        | 1          | Delivery   | 1          | 2          | 3          | 4          | 5          | 6          | 7          | 8            | 9            | 10           | 11           | 12 |  |
|----------|------------|----|----------|----------|----------|----------|----------|----------|----------|----------|----------|------------|------------|------------|------------|------------|------------|------------|------------|------------|--------------|--------------|--------------|--------------|----|--|
| 20-21    | Year Prior |    |          |          |          |          |          | 1st Trim |          |          | 2nd Trim |            |            | 0-3 months |            |            | 4-6 months |            |            | 7-9 months |              |              | 10-12 months |              |    |  |
| 22-23    | Year Prior |    |          |          |          |          |          | 1st Trim |          |          | 2nd Trim |            |            | 0-3 months |            |            | 4-6 months |            |            | 7-9 months |              |              | 10-12 months |              |    |  |
| 24-26    | Year Prior |    |          |          |          |          |          | 1st Trim |          |          | 2nd Trim |            |            | 0-3 months |            |            | 4-6 months |            |            | 7-9 months |              |              | 10-12 months |              |    |  |
| 27-28    | Year Prior |    |          |          |          |          |          | 1st Trim |          |          | 2nd Trim |            |            | 0-3 months |            |            | 4-6 months |            |            | 7-9 months |              |              | 10-12 months |              |    |  |
| 29-31    | Year Prior |    |          |          |          | 1st Trim |          |          | 2nd Trim |          |          | 3rd        | 0-3 months |            |            | 4-6 months |            |            | 7-9 months |            |              | 10-12 months |              |              |    |  |
| 32-33    | Year Prior |    |          |          |          | 1st Trim |          |          | 2nd Trim |          |          | 3rd        |            |            | 0-3 months |            |            | 4-6 months |            |            | 7-9 months   |              |              | 10-12 months |    |  |
| 34-35    | Year Prior |    |          |          | 1st Trim |          |          | 2nd Trim |          |          | 3rd Trim |            |            | 0-3 months |            |            | 4-6 months |            |            | 7-9 months |              |              | 10-12 months |              |    |  |
| 36-37    | Year Prior |    |          |          | 1st Trim |          |          | 2nd Trim |          |          | 3rd Trim |            |            | 0-3 months |            |            | 4-6 months |            |            | 7-9 months |              |              | 10-12 months |              |    |  |
| 38-39    | Year Prior |    |          | 1st Trim |          |          | 2nd Trim |          |          | 3rd Trim |          |            | 0-3 months |            |            | 4-6 months |            |            | 7-9 months |            |              | 10-12 months |              |              |    |  |
| 40-42    | Year Prior |    | 1st Trim |          |          | 2nd Trim |          |          | 3rd Trim |          |          | 0-3 months |            |            | 4-6 months |            |            | 7-9 months |            |            | 10-12 months |              |              |              |    |  |
| 43-44    | Year Prior |    | 1st Trim |          |          | 2nd Trim |          |          | 3rd Trim |          |          | 0-3 months |            |            | 4-6 months |            |            | 7-9 months |            |            | 10-12 months |              |              |              |    |  |
| 45-46    | Year Prior |    | 1st Trim |          |          | 2nd Trim |          |          | 3rd Trim |          |          | 0-3 months |            |            | 4-6 months |            |            | 7-9 months |            |            | 10-12 months |              |              |              |    |  |

Schiff DM, Nielsen T, Terplan M, Hood M, Bernson D, Diop H, et al. Fatal and nonfatal overdose among pregnant and postpartum women in Massachusetts. *Obstet Gynecol* 2018; 131.

The authors provided this information as a supplement to their article.

©2018 American College of Obstetricians and Gynecologists.

**Appendix 6: Number and rate of overdose events relative to time of delivery among 4,154 women who delivered a live birth with evidence of OUD in year prior to delivery.**

|                           | All overdose events |             |                                        |              | Overdose events on pharmacotherapy |             |                                         |              | Overdose events not on pharmacotherapy |             |                                         |               |
|---------------------------|---------------------|-------------|----------------------------------------|--------------|------------------------------------|-------------|-----------------------------------------|--------------|----------------------------------------|-------------|-----------------------------------------|---------------|
|                           | count               | person days | Rate (per 100,000 person days), 95% CI |              | count                              | person days | Rate (per 100,000 person days) , 95% CI |              | count                                  | person days | Rate (per 100,000 person days) , 95% CI |               |
| Overall                   | 242                 | 3,028,975   | 7.99                                   | (7.01-9.06)  | 49                                 | 1,105,959   | 4.43                                    | (3.28-5.86)  | 193                                    | 1,923,016   | 10.04                                   | (8.67-11.56)  |
| Year prior to conception  | 39                  | 401,292     | 9.72                                   | (6.91-13.29) | *                                  | *           | 3.74                                    | (1.02-9.57)  | *                                      | *           | 11.89                                   | (8.28-16.54)  |
| 1st Trimester (0-12 wks)  | 31                  | 348,936     | 8.88                                   | (6.04-12.61) | *                                  | *           | 4.79                                    | (1.56-11.18) | *                                      | *           | 10.63                                   | (6.94-15.58)  |
| 2nd Trimester (13-28 wks) | 15                  | 464,702     | 3.23                                   | (1.81-5.32)  | *                                  | *           | 1.20                                    | (0.15-4.35)  | *                                      | *           | 4.35                                    | (2.32-7.44)   |
| 3rd Trimester (≥29 wks)   | *                   | *           | 3.32                                   | (1.59-6.10)  | *                                  | *           | 4.08                                    | (1.32-9.51)  | *                                      | *           | 2.80                                    | (0.91-6.53)   |
| 0-3 months                | 28                  | 377,820     | 7.41                                   | (4.92-10.71) | *                                  | *           | 3.17                                    | (1.03-7.41)  | *                                      | *           | 10.44                                   | (6.62-15.67)  |
| 4-6 months                | 26                  | 377,354     | 6.89                                   | (4.50-10.10) | *                                  | *           | 1.31                                    | (0.16-4.74)  | *                                      | *           | 10.67                                   | (6.84-15.88)  |
| 7-9 months                | 46                  | 376,927     | 12.2                                   | (8.93-16.28) | *                                  | *           | 6.74                                    | (3.23-12.40) | *                                      | *           | 15.75                                   | (11.03-21.80) |
| 10-12 months              | 47                  | 380,664     | 12.35                                  | (9.07-16.42) | 16                                 | 147,621     | 10.84                                   | (6.20-17.60) | 31                                     | 233,043     | 13.3                                    | (9.04-18.88)  |

\*For all values where the overdose counts per time period were less than 11, dataset privacy requirements required suppression of cells and any cells that could allow for calculation of a specific suppressed value.
